# Supplementary material
Source: PubMed Central journal article supplement (PMC3108245)
Supplement: NIHMS273509-supplement-sup_file.pdf [file NIHMS273509-supplement-sup_file.pdf]

### Supplemental Information

Table S1. Mean air temperature, relative humidity, and rainfall in Iquitos by month during 2007 and 2009. Data were collected from a National Oceanic and Atmospheric Administration meteorological station located at the Iquitos airport roughly 6 km from the city center (National Climatic Data Center).

| Year | Month     | Avg. min. daily temp<br>° C ± SD | Avg. max. daily temp<br>° C ± SD | Mean temp<br>° C ± SD | Mean RH<br>% ± SD | Avg. daily rainfall<br>mm ± SD |
|------|-----------|----------------------------------|----------------------------------|-----------------------|-------------------|--------------------------------|
| 2007 | January   | 22.9 ± 0.5                       | 32.2 ± 1.4                       | 26.1 ± 0.9            | 83.6 ± 3.5        | 19.8 ± 37.6                    |
|      | February  | 22.2 ± 0.8                       | 34.3 ± 2.0                       | 27.2 ± 1.2            | 76.5 ± 6.0        | 4.6 ± 12.4                     |
|      | March     | 22.6 ± 0.7                       | 31.9 ± 1.6                       | 25.8 ± 0.8            | 83.2 ± 3.3        | 20.9 ± 36.1                    |
|      | April     | 22.7 ± 0.8                       | 32.1 ± 1.5                       | 25.8 ± 1.0            | 83.5 ± 4.2        | 21.8 ± 33.8                    |
|      | May       | 22.0 ± 1.9                       | 31.4 ± 2.2                       | 25.1 ± 1.9            | 83.1 ± 3.2        | 15.6 ± 32.2                    |
|      | June      | 21.6 ± 0.8                       | 30.8 ± 1.4                       | 25.0 ± 0.7            | 83.6 ± 3.1        | 5.0 ± 10.6                     |
|      | July      | 20.8 ± 1.9                       | 31.3 ± 1.6                       | 25.0 ± 1.1            | 80.6 ± 4.4        | 4.9 ± 10.1                     |
|      | August    | 21.2 ± 0.9                       | 32.1 ± 1.3                       | 25.5 ± 0.8            | 80.2 ± 4.1        | 7.2 ± 14.9                     |
|      | September | 21.7 ± 0.6                       | 32.7 ± 1.5                       | 25.8 ± 1.0            | 80.5 ± 4.1        | 12.8 ± 26.1                    |
|      | October   | 22.3 ± 0.8                       | 32.5 ± 1.5                       | 25.8 ± 1.2            | 81.9 ± 5.2        | 12.9 ± 28.6                    |
|      | November  | 22.8 ± 0.6                       | 32.2 ± 1.6                       | 25.9 ± 1.1            | 82.9 ± 4.7        | 18.0 ± 32.6                    |
|      | December  | 22.9 ± 0.8                       | 31.8 ± 1.3                       | 26.2 ± 0.9            | 82.1 ± 3.9        | 19.6 ± 48.7                    |
| 2009 | January   | 22.0 ± 0.6                       | 31.9 ± 1.8                       | 25.5 ± 0.9            | 86.0 ± 3.9        | 9.5 ± 15.1                     |
|      | February  | 21.6 ± 0.7                       | 33.0 ± 1.5                       | 25.9 ± 0.9            | 84.0 ± 4.0        | 9.9 ± 14.4                     |
|      | March     | 22.5 ± 0.7                       | 31.8 ± 2.5                       | 25.8 ± 1.0            | 84.5 ± 4.3        | 8.6 ± 16.4                     |
|      | April     | 22.3 ± 0.7                       | 31.6 ± 1.8                       | 25.7 ± 1.0            | 86.2 ± 4.4        | 13.0 ± 20.1                    |
|      | May       | 22.4 ± 0.6                       | 32.5 ± 1.7                       | 26.2 ± 0.9            | 82.8 ± 4.3        | 4.1 ± 9.6                      |
|      | June      | 21.5 ± 1.1                       | 31.6 ± 1.9                       | 25.3 ± 1.0            | 85.0 ± 3.1        | 3.5 ± 5.3                      |
|      | July      | 21.7 ± 0.6                       | 32.0 ± 1.7                       | 25.4 ± 0.8            | 84.5 ± 3.4        | 3.7 ± 6.2                      |

|           |                |                |                |                |                |
|-----------|----------------|----------------|----------------|----------------|----------------|
| August    | $21.9 \pm 0.6$ | $33.4 \pm 2.0$ | $26.4 \pm 1.2$ | $81.4 \pm 4.7$ | $3.5 \pm 5.6$  |
| September | $22.2 \pm 0.9$ | $34.6 \pm 1.5$ | $26.8 \pm 1.0$ | $79.8 \pm 4.1$ | $3.7 \pm 8.5$  |
| October   | $22.2 \pm 0.9$ | $33.8 \pm 1.3$ | $26.6 \pm 1.0$ | $81.5 \pm 3.9$ | $6.7 \pm 17.5$ |
| November  | $22.9 \pm 0.9$ | $34.2 \pm 1.4$ | $27.0 \pm 1.2$ | $81.6 \pm 4.3$ | $7.6 \pm 12.3$ |
| December  | $22.7 \pm 0.7$ | $32.5 \pm 1.7$ | $26.4 \pm 1.2$ | $83.7 \pm 5.1$ | $7.7 \pm 12.9$ |

### References Cited

**National Climatic Data Center, United States Department of Commerce.** Online Climate Data Directory. NCDC, 5 Aug. 2009. Web. Accessed 15 Aug. 2009  
 <<http://www.ncdc.noaa.gov/oa/climate/climatedata.html>>.
